# Supplementary material for: Extended-Spectrum β-Lactamases (ESBL) Producing Bacteria in Animals
Source: Antibiotics (Basel). 2023 Mar 28;12(4):661. doi: 10.3390/antibiotics12040661 (PMC10135299; doi:10.3390/antibiotics12040661)
Supplement: Supplementary file 1 [file antibiotics-12-00661-s001.zip › antibiotics-2275129-supplementary.pdf]

# Supplementary Materials

## File S1: Review Protocol

### Project Information

|                       |                                                                            |
|-----------------------|----------------------------------------------------------------------------|
| <b>Review Title</b>   | Extended-spectrum $\beta$ -lactamases (ESBL) producing bacteria in animals |
| <b>Project Lead</b>   | Po-Yu Liu                                                                  |
| <b>Team Members</b>   | Chien-Hao Tseng<br>Chia-Wei Liu                                            |
| <b>Date</b>           | 2022/05 – 2023/02                                                          |
| <b>Institution(s)</b> | Taichung Veterans General Hospital                                         |

### Background

*Describe the population and problem or phenomenon of interest and contextualize it.*

Animals have been identified as potential reservoirs and vectors of resistance genes, with studies showing that gram-negative bacteria can acquire resistance through the horizontal transmission of resistance genes on plasmids. It is important to understand the distribution of antimicrobial-resistant bacteria and their drug-resistant genes in both humans and animals.

### Objective

*Describe the justification for this review and why it/the information it collects is important.*

There have been many studies reporting the presence of *bla*<sub>ESBL</sub> in animals. While some review articles have attempted to summarize these studies, most of them have focused on a specific type of bacteria (such as *Escherichia coli* or *Klebsiella pneumoniae*) or only reviewed one type of animal, lacking a comprehensive review. Our objective is to compile all ESBL bacteria isolated from various animals in recent years, providing us with a comprehensive understanding of the distribution of ESBL bacteria and genes in animals worldwide.

### Search Strategy

#### Databases

*List the bibliographic databases to be searched.*

Pubmed

#### Hand Searching

*List journals or websites that will be hand searched for relevant articles.*

Nil

#### Experts or Stakeholders

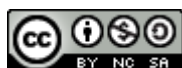

Review Protocol Template by Sarah Visintini is licensed under a [Creative Commons Attribution-NonCommercial-ShareAlike 4.0 International License](https://creativecommons.org/licenses/by-nc-sa/4.0/).

*If experts are being contacted for additional grey literature or research, list them.*

Nil

### Reference Searches

*If forward or backward citations will be performed, detail them here.*

For the thirty articles we have collected that meet the inclusion criteria, we performed a second-level backward reference search.

### Eligibility Criteria

*Operationalize your PICO (or other framework) concepts by explicitly stating what would and would not meet inclusion.*

| PICO         | Inclusion Criteria                       | Exclusion Criteria   |
|--------------|------------------------------------------|----------------------|
| Population   | ESBL-producing bacteria                  |                      |
| Intervention | cultured from specimens of animal origin | Environment<br>human |
| Comparison   | nil                                      |                      |
| Outcomes     | nil                                      |                      |

### Data Extraction

*Provide a description of methods used to collect data from included studies (e.g. categories of data you intend to collect, how many people will conduct extraction, etc.).*

We extracted data from all selected literature using a standardized table. The data were grouped as follows: author, date of publication, countries, sampling date and location, sample type, animal species, targeted bacteria, selective media, methods for target identification, the number of denominators, the number of ESBL target, methods for detecting ESBL, methods for detecting ESBL genes and the number of particular ESBL genes. The collected data were entered into standardized data extraction sheets using Microsoft Excel 2019 (Microsoft Corp, Seattle, WA) for data extraction.

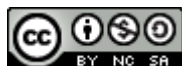

Review Protocol Template by Sarah Visintini is licensed under a [Creative Commons Attribution-NonCommercial-ShareAlike 4.0 International License](https://creativecommons.org/licenses/by-nc-sa/4.0/).

## Study Quality Assessment

*If applicable, describe the tool(s) you will use to assess risk of bias.*

The quality of each study will be assessed using the Newcastle-Ottawa Scale.

## Data Synthesis

*Describe how you will analyze and summarize the included study results.*

The extracted data will be synthesized using statistical methods such as meta-analysis, or if not feasible, may change to narrative synthesis. The heterogeneity between the studies will be assessed.

## Project Tools

*List the tools and software programs you plan to use in the course of the review.*

PubMed: search articles  
EndNote: create citations and reference lists  
Excel: data extraction and analysis  
PRISMA: provide a framework for our review

## Project Timetable

*Fill out the following Gantt chart according to your estimated project timelines.*

|                                        | 2022/5 | 2022/6 | 2022/7 | 2022/8 | 2022/9 | 2022/10 | 2022/11 | 2022/12 | 2023/1 | 2023/2 |
|----------------------------------------|--------|--------|--------|--------|--------|---------|---------|---------|--------|--------|
| <b>Preparation</b>                     |        |        |        |        |        |         |         |         |        |        |
| <b>Conduct searches</b>                |        |        |        |        |        |         |         |         |        |        |
| <b>Pilot test eligibility criteria</b> |        |        |        |        |        |         |         |         |        |        |
| <b>Ti/Ab + Full Text Selection</b>     |        |        |        |        |        |         |         |         |        |        |
| <b>Pilot test data collection</b>      |        |        |        |        |        |         |         |         |        |        |
| <b>Data collection</b>                 |        |        |        |        |        |         |         |         |        |        |

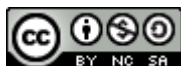

|                                       |  |  |  |  |  |  |  |  |  |  |
|---------------------------------------|--|--|--|--|--|--|--|--|--|--|
| Pilot risk of bias assessments        |  |  |  |  |  |  |  |  |  |  |
| Conduct assessments                   |  |  |  |  |  |  |  |  |  |  |
| Conduct synthesis & interpret results |  |  |  |  |  |  |  |  |  |  |
| Write manuscript                      |  |  |  |  |  |  |  |  |  |  |

### Research Team Member Roles

*Describe the different tasks on the review and who will be responsible for what.*

| Task                                  | Description                                                                                                                                                                                                                    | Team Member Responsible                      |
|---------------------------------------|--------------------------------------------------------------------------------------------------------------------------------------------------------------------------------------------------------------------------------|----------------------------------------------|
| Conduct searches                      | searching the selected databases using the developed search terms and strategies                                                                                                                                               | Po-Yu Liu<br>Chien-Hao Tseng                 |
| Pilot test eligibility criteria       | testing the eligibility criteria on a small sample of studies to ensure that they are appropriate for the review                                                                                                               | Po-Yu Liu<br>Chien-Hao Tseng                 |
| Full Text Selection                   | screening the titles and abstracts of studies retrieved from the search to identify potentially relevant studies, and then reviewing the full text of these studies to determine their eligibility for inclusion in the review | Po-Yu Liu<br>Chien-Hao Tseng<br>Chia-Wei Liu |
| Pilot test data collection            | piloting the data extraction form on a small sample of studies to ensure that it captures all the necessary data                                                                                                               | Po-Yu Liu<br>Chien-Hao Tseng                 |
| Data collection                       | extracting data from the included studies using the developed data extraction form                                                                                                                                             | Chien-Hao Tseng<br>Chia-Wei Liu              |
| Pilot risk of bias assessments        | piloting the risk of bias assessment tool on a small sample of studies to ensure that it accurately assesses the quality of the included studies.                                                                              | Po-Yu Liu<br>Chien-Hao Tseng                 |
| Conduct assessments                   | using the developed risk of bias assessment tool to assess the quality of the included studies                                                                                                                                 | Chien-Hao Tseng<br>Chia-Wei Liu              |
| Conduct synthesis & interpret results | synthesizing the data from the included studies and interpreting the results                                                                                                                                                   | Po-Yu Liu<br>Chien-Hao Tseng<br>Chia-Wei Liu |
| Write manuscript - Original Draft     | writing the final manuscript for the review – original draft                                                                                                                                                                   | Chien-Hao Tseng                              |



|                                        |                                                                  |           |
|----------------------------------------|------------------------------------------------------------------|-----------|
| Write manuscript -<br>Review & Editing | writing the final manuscript for the review – review and editing | Po-Yu Liu |
|----------------------------------------|------------------------------------------------------------------|-----------|

## References

This Review Protocol was originally created by Sarah Visintini, Maritime SPOR SUPPORT Unit and was available from the following resources:

University of Alabama, University Libraries. A Research Guide for Systematic Literature Reviews. Available online: <https://guides.lib.ua.edu/c.php?g=1135040&p=8286355> (accessed on 24 May 2022)

Additionally, this Systematic Review Protocol Template was adapted by Chien-Hao Tseng to suit the specific needs of our Review.



Review Protocol Template by Sarah Visintini is licensed under a [Creative Commons Attribution-NonCommercial-ShareAlike 4.0 International License](https://creativecommons.org/licenses/by-nc-sa/4.0/).
